# Supplementary material for: Organic amine weakens chloride depletion in coastal atmosphere
Source: Copernicus journal article supplement (doi:10.5194/egusphere-2026-197), 2026-02-02
Supplement: Supplementary file 1 [file egusphere-2026-197-supplement.pdf]

*Supplement of*

## **Organic amine weakens chloride depletion in coastal atmosphere**

Aijing Song<sup>1</sup>, Kun Li<sup>1</sup>, Zhaomin Yang<sup>1</sup>, Li Xu<sup>2</sup>, Narcisse Tsona Tchinda<sup>1</sup>, and Lin Du<sup>1,2,3,\*</sup>

<sup>1</sup>Qingdao Key Laboratory for Prevention and Control of Atmospheric Pollution in Coastal Cities, Environment Research Institute, Shandong University, Qingdao 266237, China

<sup>2</sup>School of Environmental Science and Engineering, Shandong University, Qingdao 266237, China

<sup>3</sup>State Key Laboratory of Microbial Technology, Shandong University, Qingdao 266237, China

*Correspondence to: Lin Du (lindu@sdu.edu.cn)*

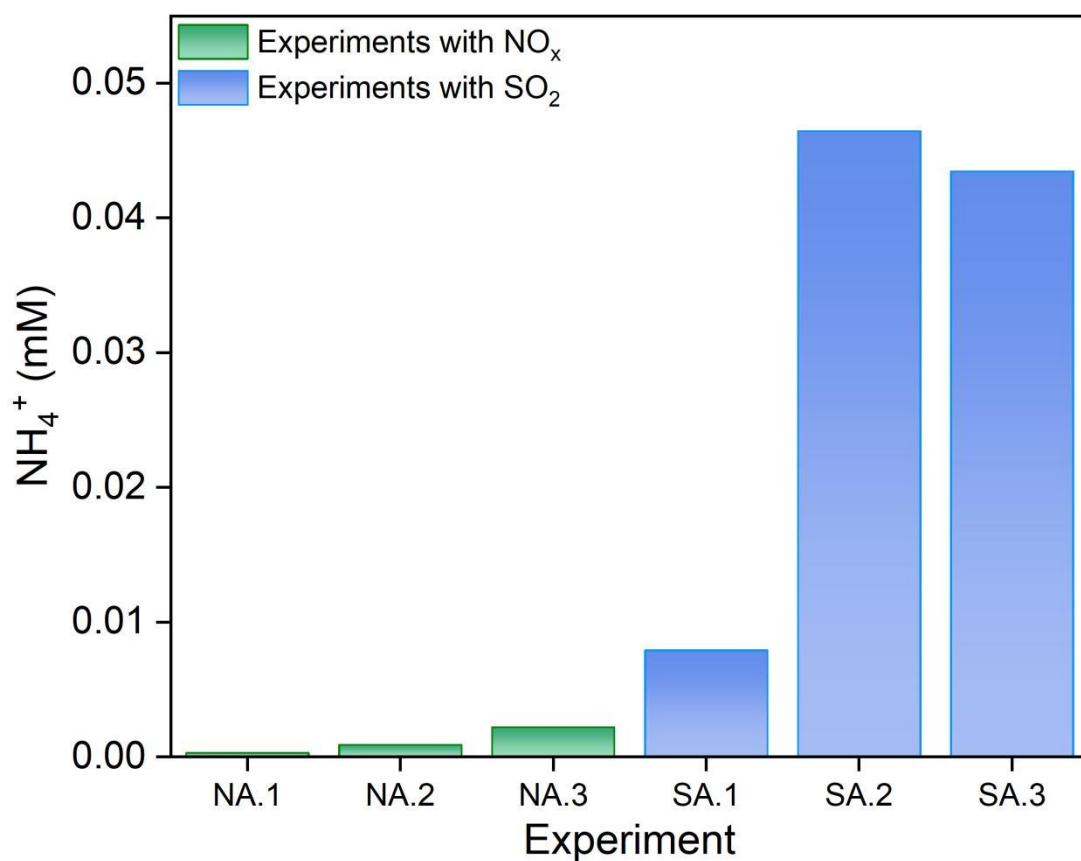

**Figure S1.**  $\text{NH}_4^+$  concentration under different experimental conditions.

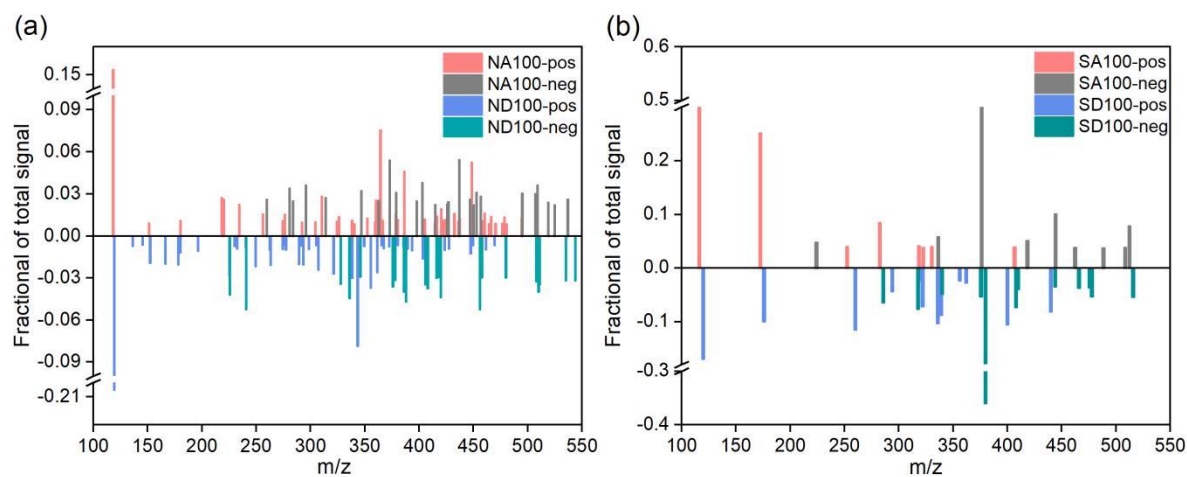

**Figure S2.** Mass spectra of organic chlorinated compounds for different experiments in the presence of (a)  $\text{NO}_x$  and (b)  $\text{SO}_2$ .

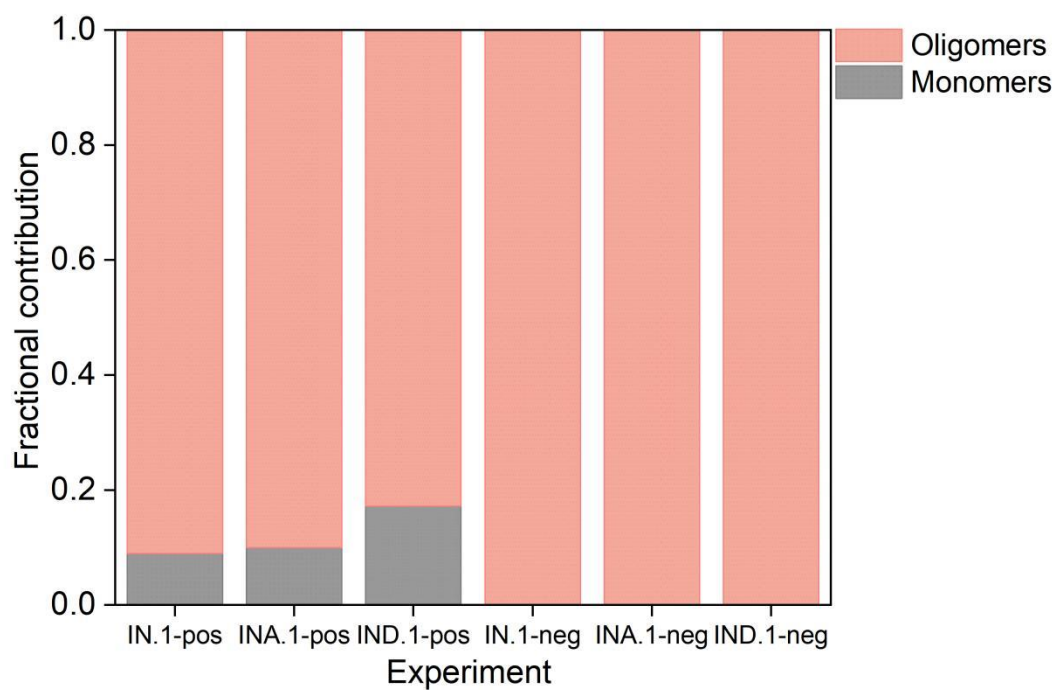

**Figure S3.** Fractional contribution of organic chlorinated monomers ( $C \leq 5$ ) and oligomers ( $C > 5$ ) for different experiments with  $\text{NO}_x$ .

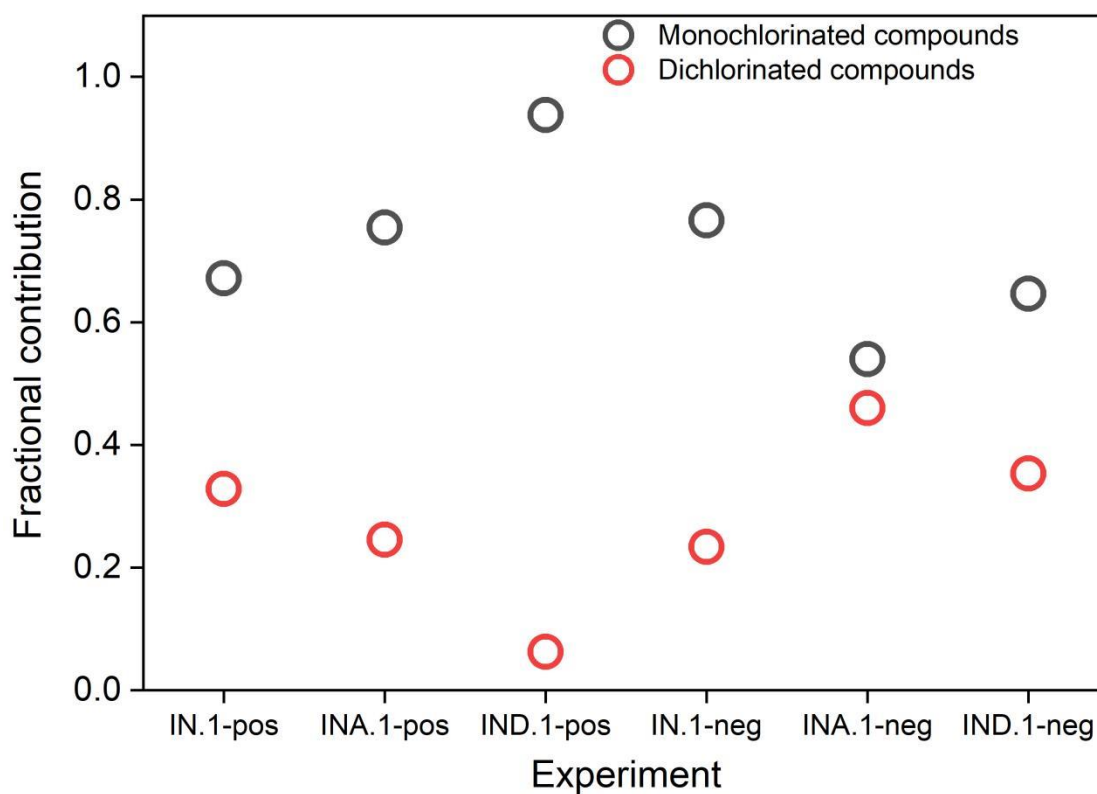

**Figure S4.** Fractional contribution of monochlorinated and dichlorinated compounds in the total organic chlorinated compounds for different experiments with  $\text{NO}_x$ .

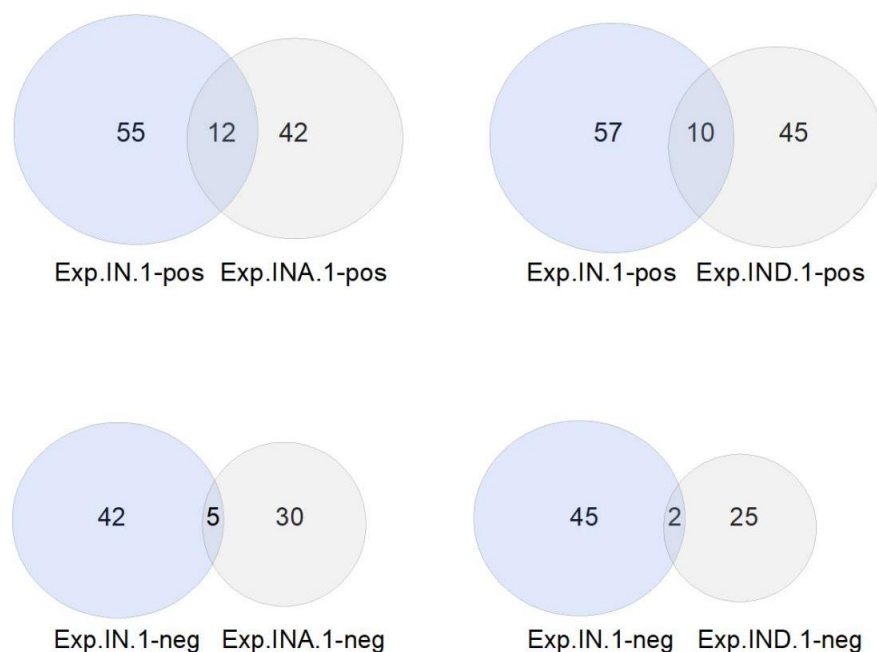

**Figure S5.** Venn diagram for all molecular formulas of organic chlorinated compounds between Exp.N.1 and Exp.NA.1/Exp.ND.1. Numbers represent the count of molecular formulas within each subset.

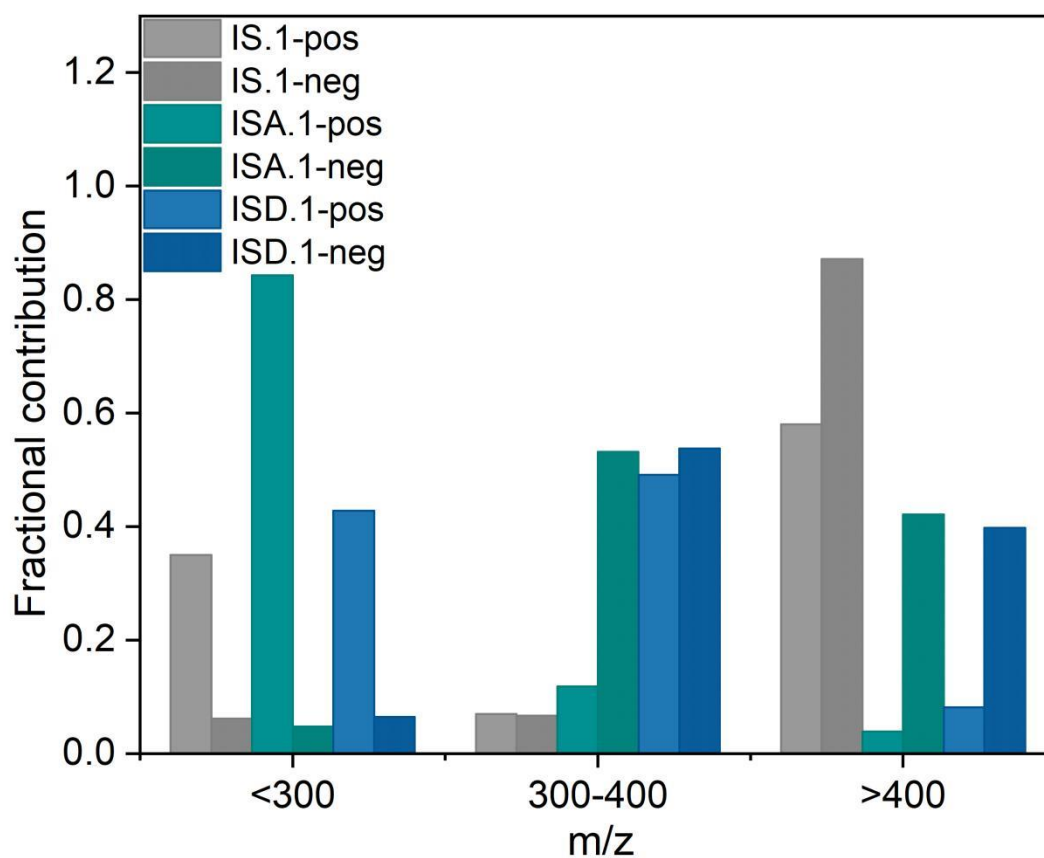

**Figure S6.** Distribution of identified molecules for different experiments with SO<sub>2</sub>.
